# Supplementary material for: Toll-like Receptor 4 Deficiency Reduces Oxidative Stress and Macrophage Mediated Inflammation in Hypertensive Kidney
Source: PubMed Central journal article supplement (PMC5526876; doi:10.1038/s41598-017-06484-6), 2017-07-25
Supplement: 41598_2017_6484_MOESM1_ESM.pdf [file 41598_2017_6484_MOESM1_ESM.pdf]

## Supplementary information

### Toll-like Receptor 4 Deficiency Reduces Oxidative Stress and Macrophage Mediated Inflammation in Hypertensive Kidney

Sathnur Pushpakumar<sup>1</sup>, MD, PhD, Lu Ren<sup>1</sup>, PhD, Sourav Kundu<sup>2</sup>, PhD, Alejandra Gamon<sup>3</sup>,  
Suresh C. Tyagi<sup>1</sup>, PhD, Utpal Sen<sup>1</sup>, PhD\*

<sup>1</sup>Department of Physiology, University of Louisville School of Medicine, Louisville, KY-40202

<sup>2</sup>Institute of Advanced Study in Science and Technology, Guwahati, Assam – 781035, India

<sup>3</sup>University of California, San Diego, CA 92093

**Running title:** TLR4 induced oxidative stress and renal inflammation

**Keywords:** TLR4, hypertension, oxidative stress, macrophage, bone marrow-derived fibroblast

Word count: 5487

Number of Figures: 12

No. of tables: 1

Correspondence:

Utpal Sen, Ph.D.  
500 S Preston St.  
HSC-A, Room 802,  
University of Louisville,  
KY-40202,  
Ph: 502-852-2030;  
Fax: 502-852-6239;  
Email: [utpal.sen@louisville.edu](mailto:utpal.sen@louisville.edu)

Figure 5C

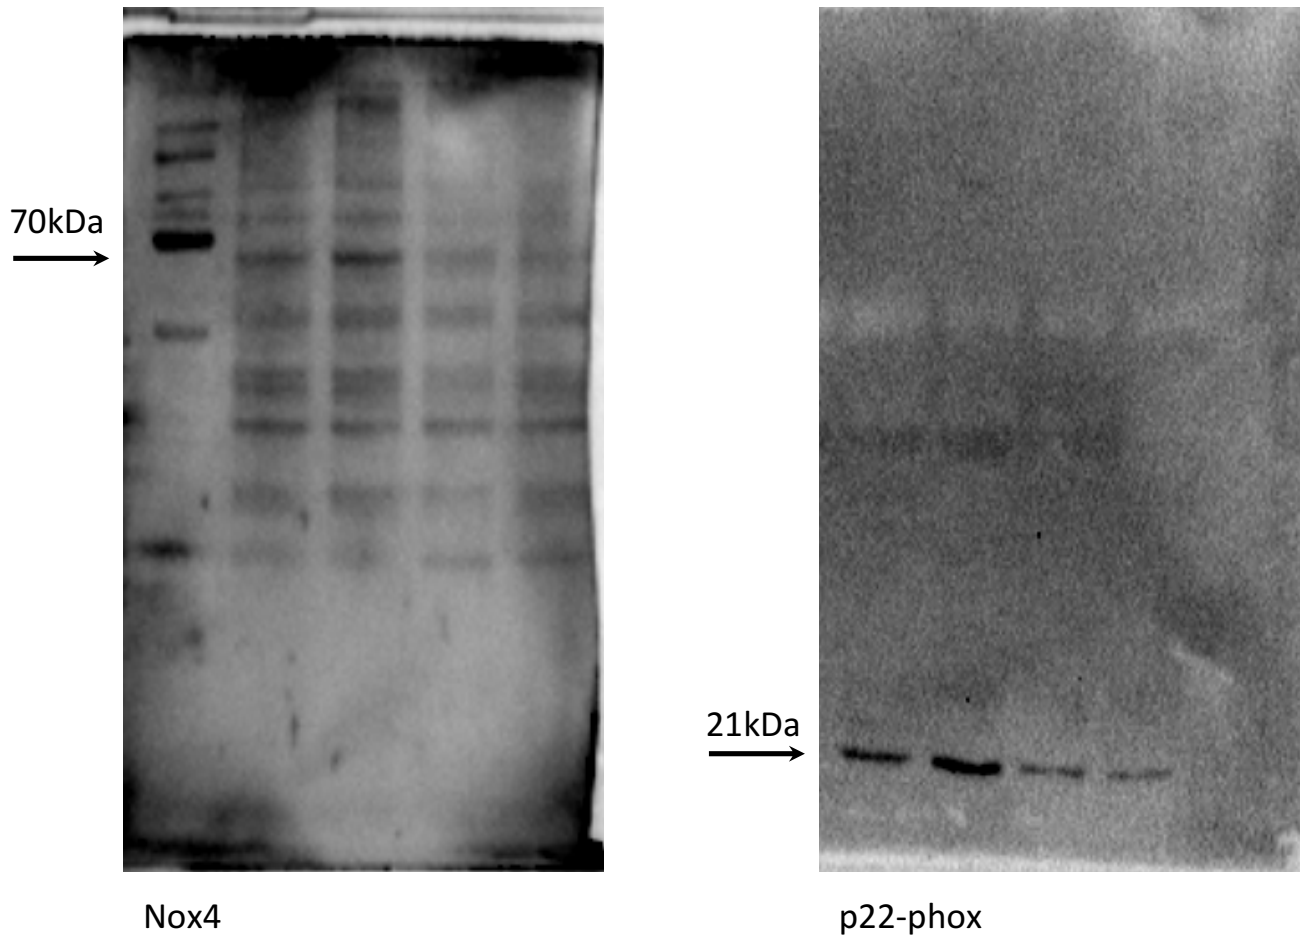

Supplementary figure S1: Uncropped images for Nox4 and p22-phox.

Figure 8A

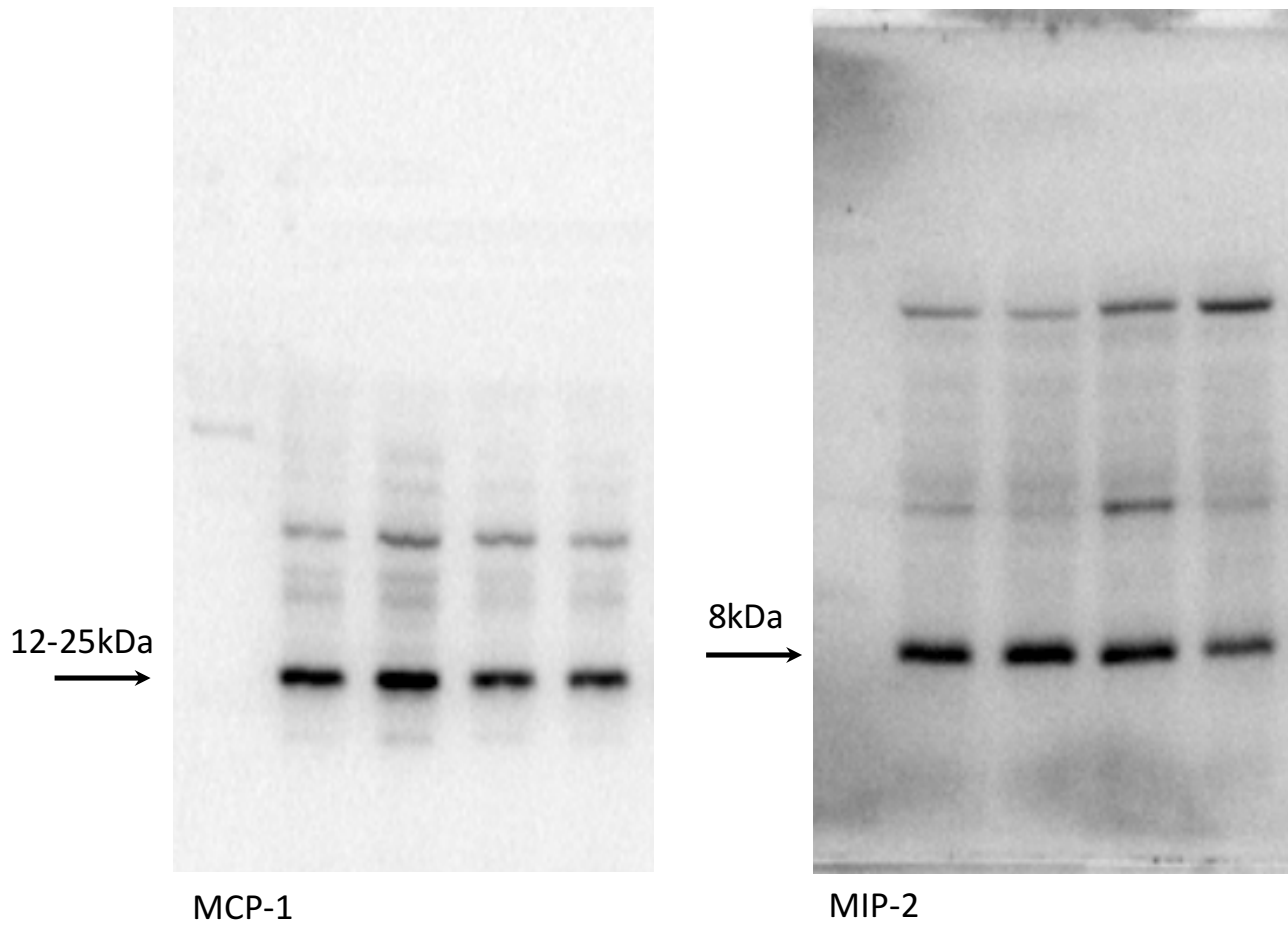

Supplementary figure S2: Uncropped images for MCP-1 and MIP-2.

Figure 8A

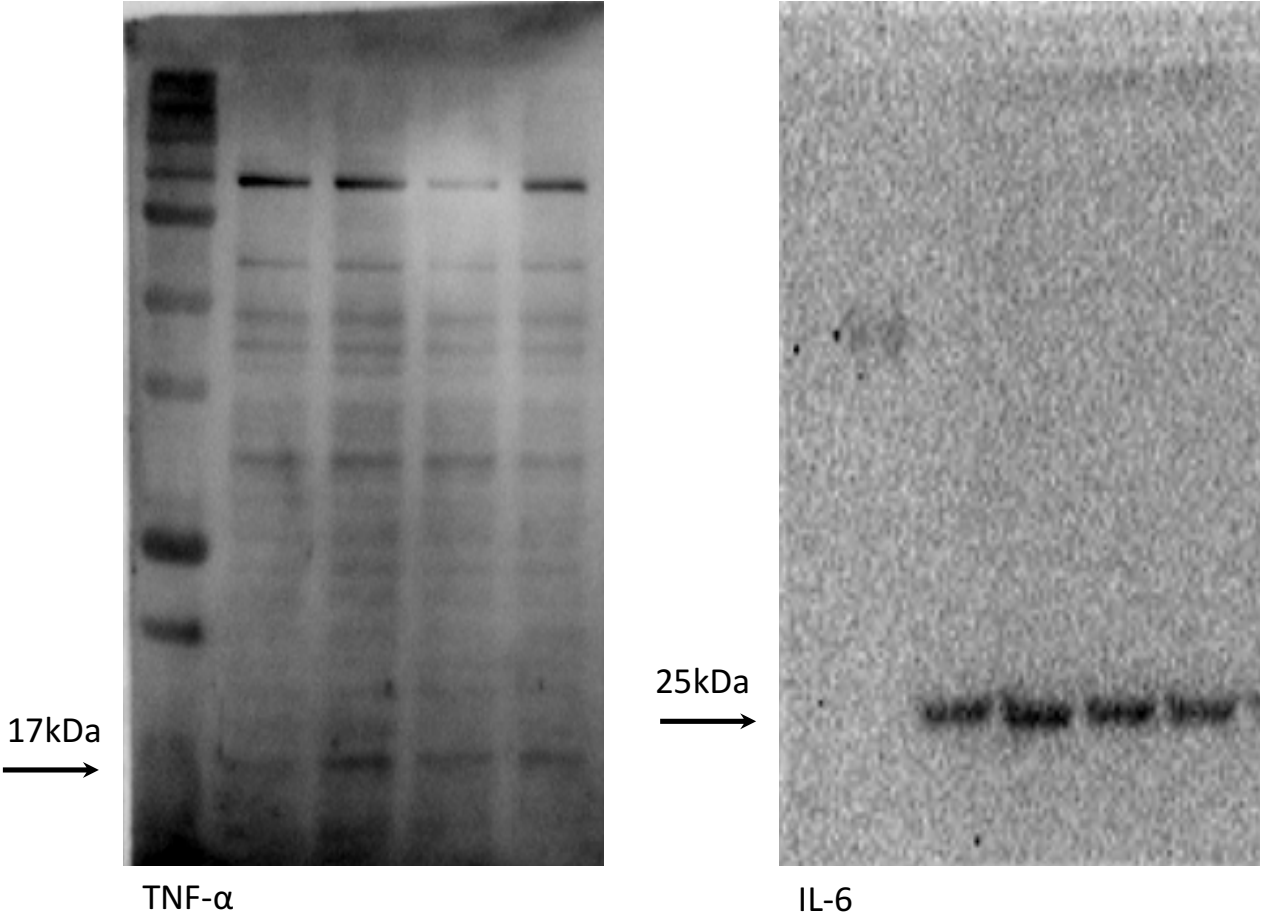

Supplementary figure S3: Uncropped images for TNF-α and IL-6.

Figure 9A

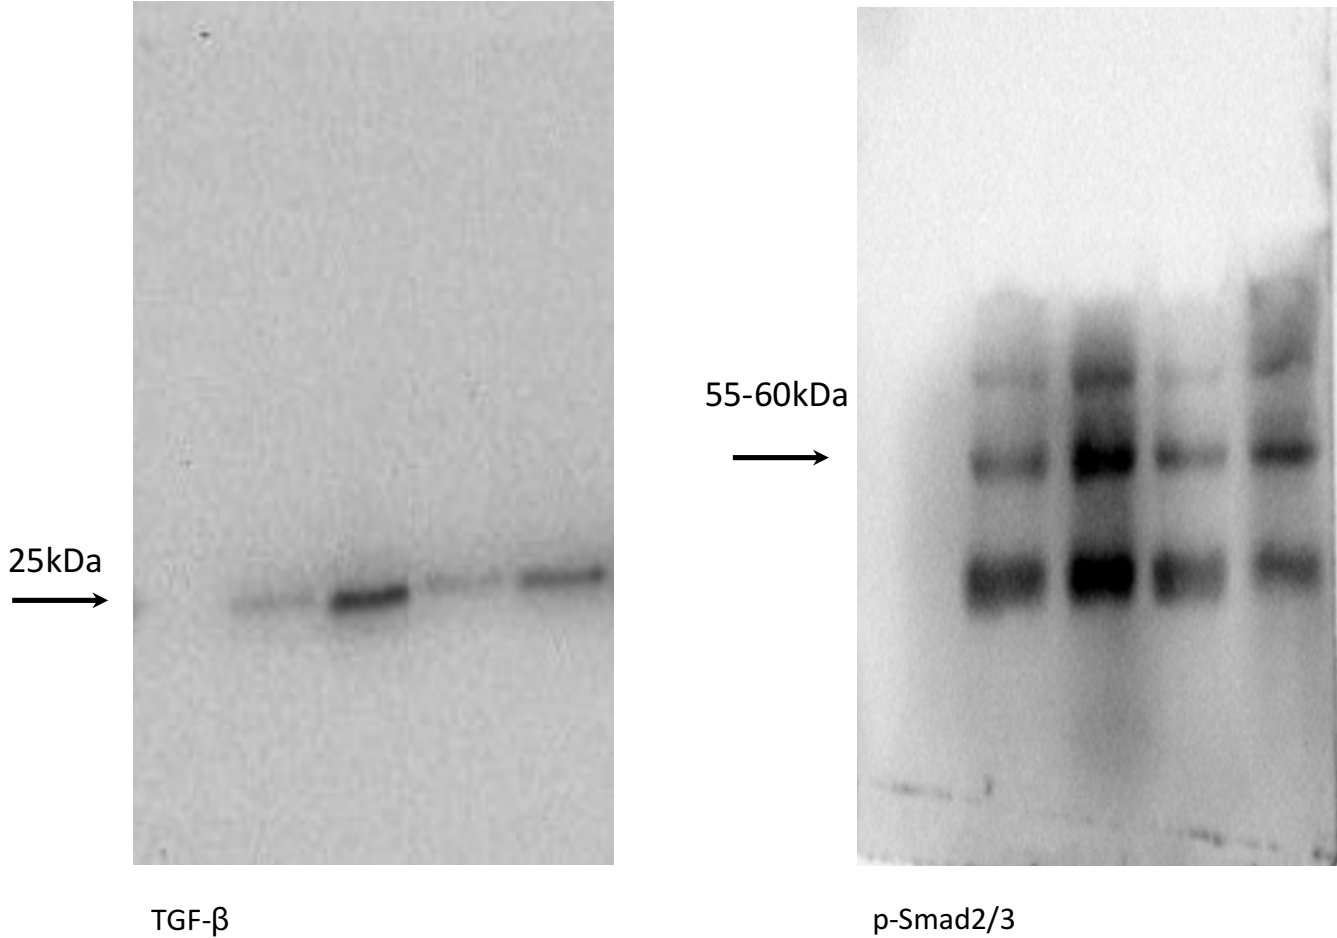

Supplementary figure S4: Uncropped images for TGF-β and p-Smad2/3.

Figure 9C

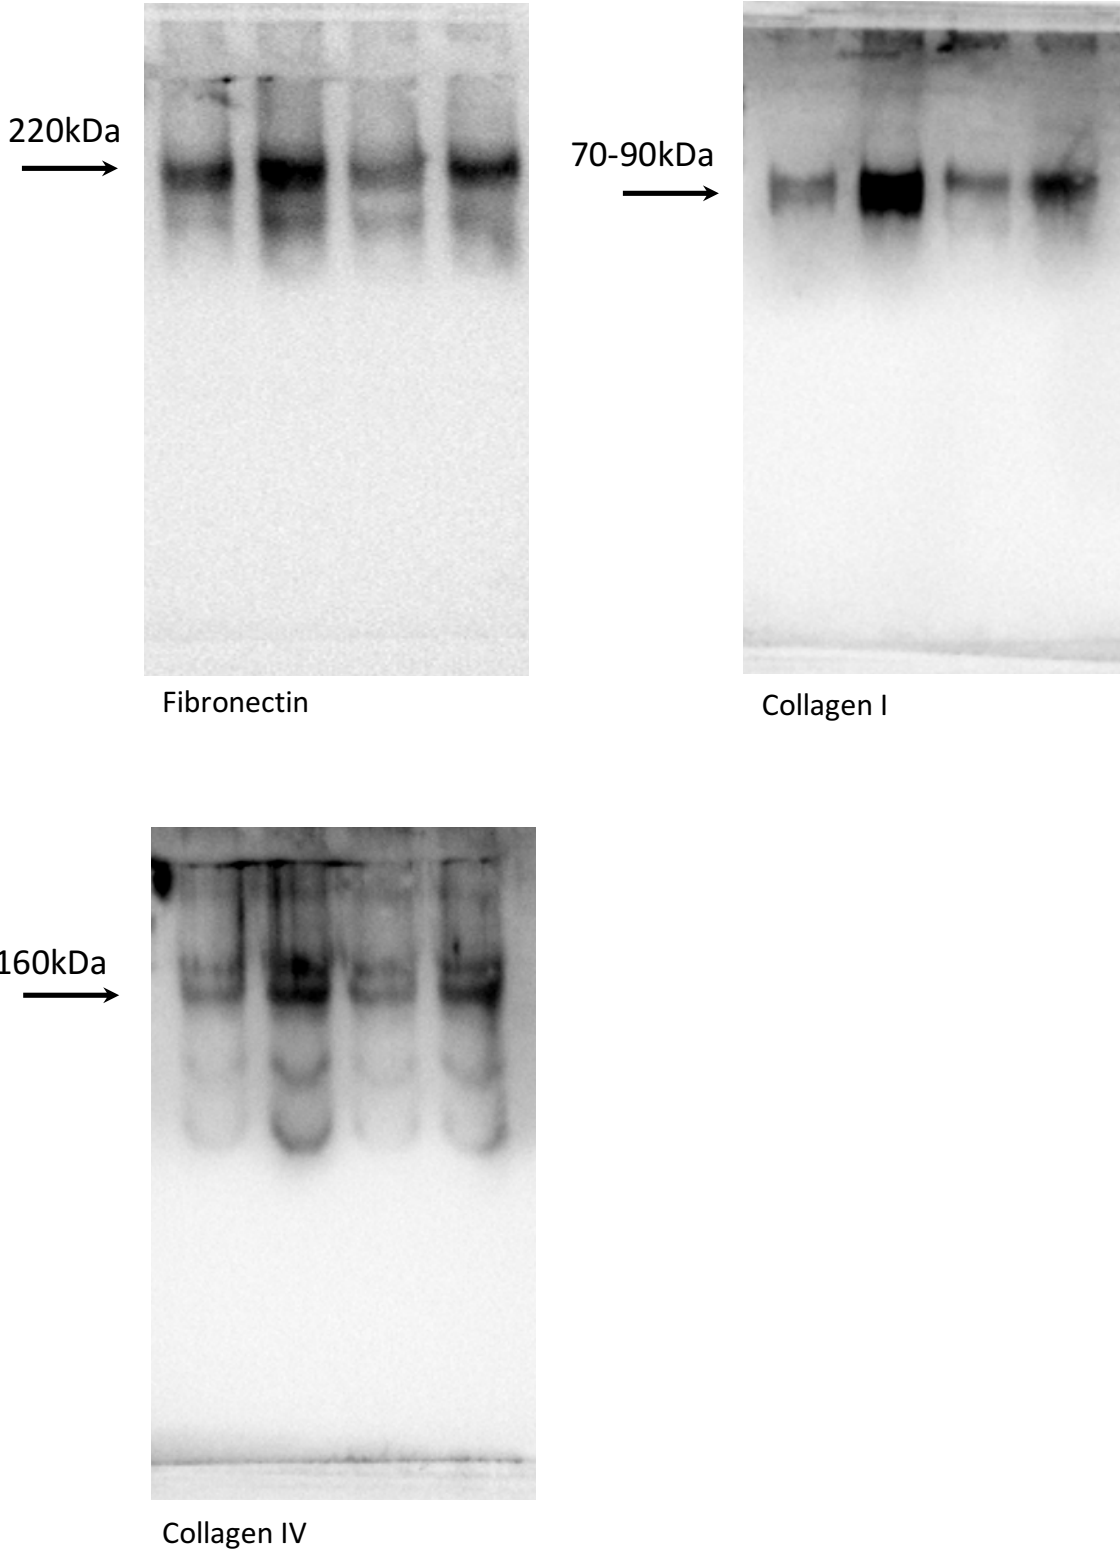

Supplementary figure S5: Uncropped images for fibronectin, collagen 1 and collagen IV.
